# Supplementary material for: Aggregation-mediated photo-responsive luminescence of cyanostilbene based cruciform AIEgens
Source: Royal Society of Chemistry journal article supplement (doi:10.1039/d0tc05131d), 2020-12-10
Supplement: d0tc05131d1.pdf [file d0tc05131d1.pdf]

*Electronic Supplementary Information*

**Aggregation-mediated photochromic luminescence of cyano-stilbene based cruciform AIEgens**

Zhibo Zhang,<sup>a,b</sup> Xiaoqing Liu,<sup>c</sup> Yang Feng,<sup>a</sup> Zhen-Qiang Yu,<sup>d</sup> Lei Wang,<sup>a</sup> Xiangkui Ren<sup>\*b</sup> and Yi Liu<sup>\*a</sup>

*<sup>a</sup>.Shenzhen Key Laboratory of Polymer Science and Technology, Guangdong Research Center for Interfacial Engineering of Functional Materials, College of Materials Science and Engineering, Shenzhen University, Shenzhen 518060, China. E-mail: [liuyiacee@szu.edu.cn](mailto:liuyiacee@szu.edu.cn)*

*<sup>b</sup>.School of Chemical Engineering and Technology, Tianjin University, Tianjin 300350, China. E-mail: [renxiangkui@tju.edu.cn](mailto:renxiangkui@tju.edu.cn)*

*<sup>c</sup>.Shenzhen Grubbs Institute, Southern University of Science and Technology, Shenzhen 518005, China*

*<sup>d</sup>.School of Chemistry and Environmental Engineering, Centre for AIE Research, Shenzhen University, Shenzhen 518060, China.*

## *Table of content*

### **1. General materials**

Materials

Characterizations and instruments

### **2. Structural characterizations**

### **3. Figures and charts**

### **4. NMR spectra**

## 1. General materials

**Materials:** 2,2',7,7'-tetrabromo-9,9'-spirobi[fluorene], 4-acetylphenylboronic, 4-hydroxy - benzyl cyanide, 4-methoxyphenyl cyanide, 1-Bromododecane, K<sub>2</sub>CO<sub>3</sub>, NaOH, tetrahydrofuran, ethanol, tetrakis(triphenylphosphine)palladium, triphenylphosphine, toluene, triethylamine, dichloromethane, *n*-Hexane, ethyl acetate, and were all purchased from Energy Chemical (Shanghai, China). All these materials are analytical grade and used as received.

**Characterizations and instruments:** <sup>1</sup>H, <sup>13</sup>C NMR spectra, 2D <sup>1</sup>H-<sup>1</sup>H correlation spectroscopy (COSY), nuclear overhauser effect spectroscopy (NOESY) and heteronuclear singular quantum correlation (HSQC) were measured on a Bruker AVANCE III 400MHz, 500MHz or 600MHz spectrometer using CDCl<sub>3</sub> as solvent and tetramethylsilane (TMS,  $\delta = 0$ ) as internal standard. High-resolution (HR) mass spectra were recorded on a Thermo Scientific Q-Exactive Focus (FTMS + p ESI) mass spectrometer. Absorption spectra were taken on a Thermo-fisher Evolution 220 spectrometer. Emission spectra were taken on a Thermo Lumina Fluorescent spectrometer. Powder XRD patterns were recorded on a RigakuSmartLab X-ray Diffractometer. Infrared spectroscopy (IR) were taken on a Fourier Transform Infrared Spectrometer Nicolet 6700. Gel permeation chromatography (GPC) were taken on a Waters e2695 Separations Module. Fluorescence photomicrograph were taken on a fluorescence microscope Leica DMI8.

## 2. Structural characterization

D:\Raw Data\...\Feng yang\20200915\3a

09/15/20 10:46:48

3a #17 RT: 0.07 AV: 1 NL: 4.11E8

T: FTMS + p APCI corona Full lock ms [300.0000-2500.0000]

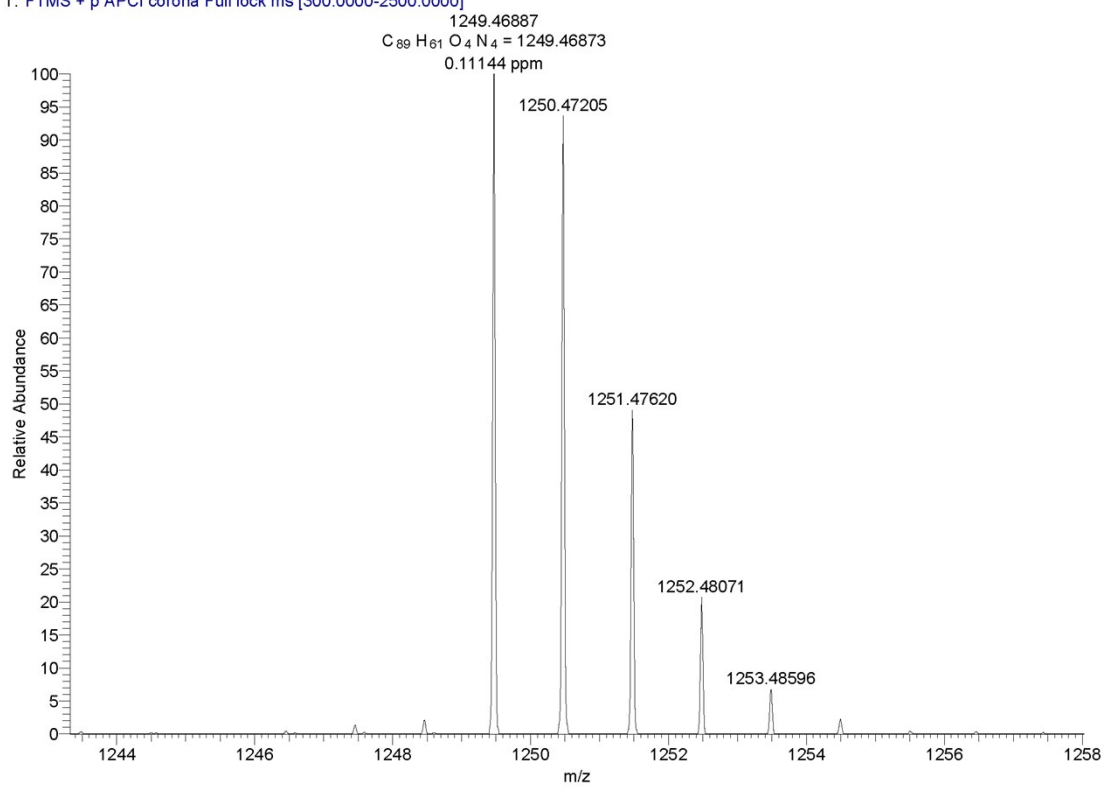

**Figure S1.** High-resolution (HR) mass spectrum of cruciform AIEgen CA1.

3b #19 RT: 0.09 AV: 1 NL: 2.75E6  
T: FTMS + p APCI corona Full lock ms [300.0000-2500.0000]

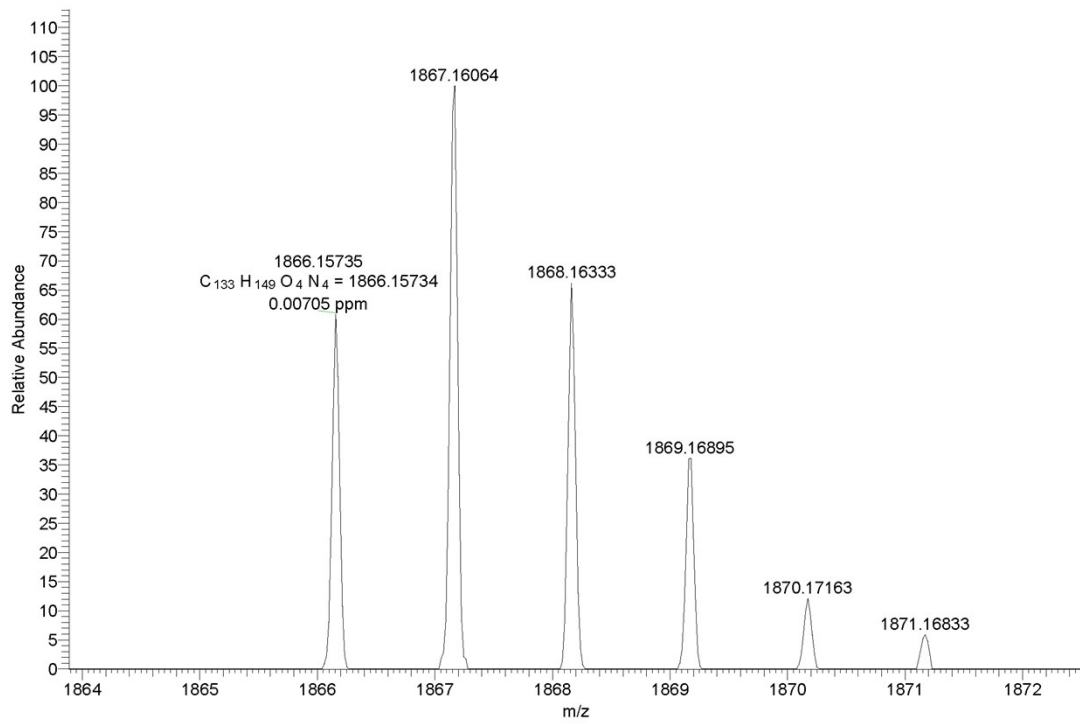

**Figure S2.** High-resolution (HR) mass spectrum of cruciform AIEgen CA2.

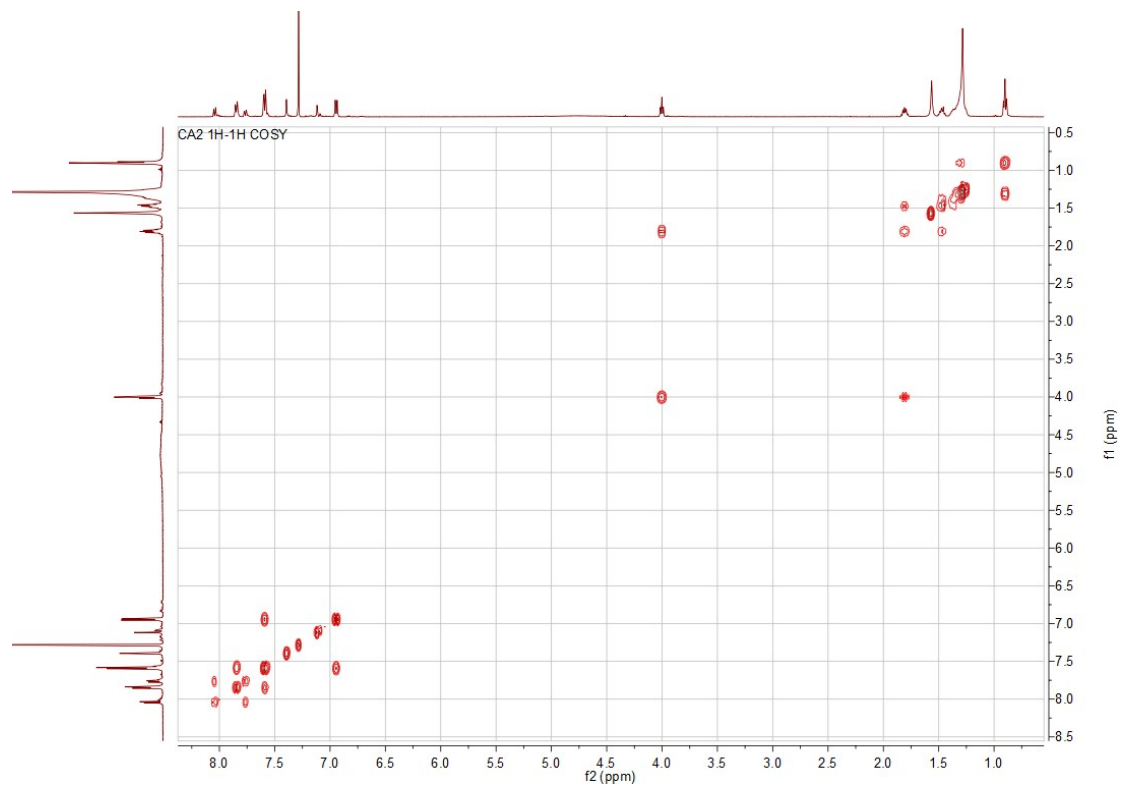

**Figure S3.** Partial 2D  $^1\text{H}$ - $^1\text{H}$  COSY NMR spectrum of CA2 in  $\text{CDCl}_3$ .

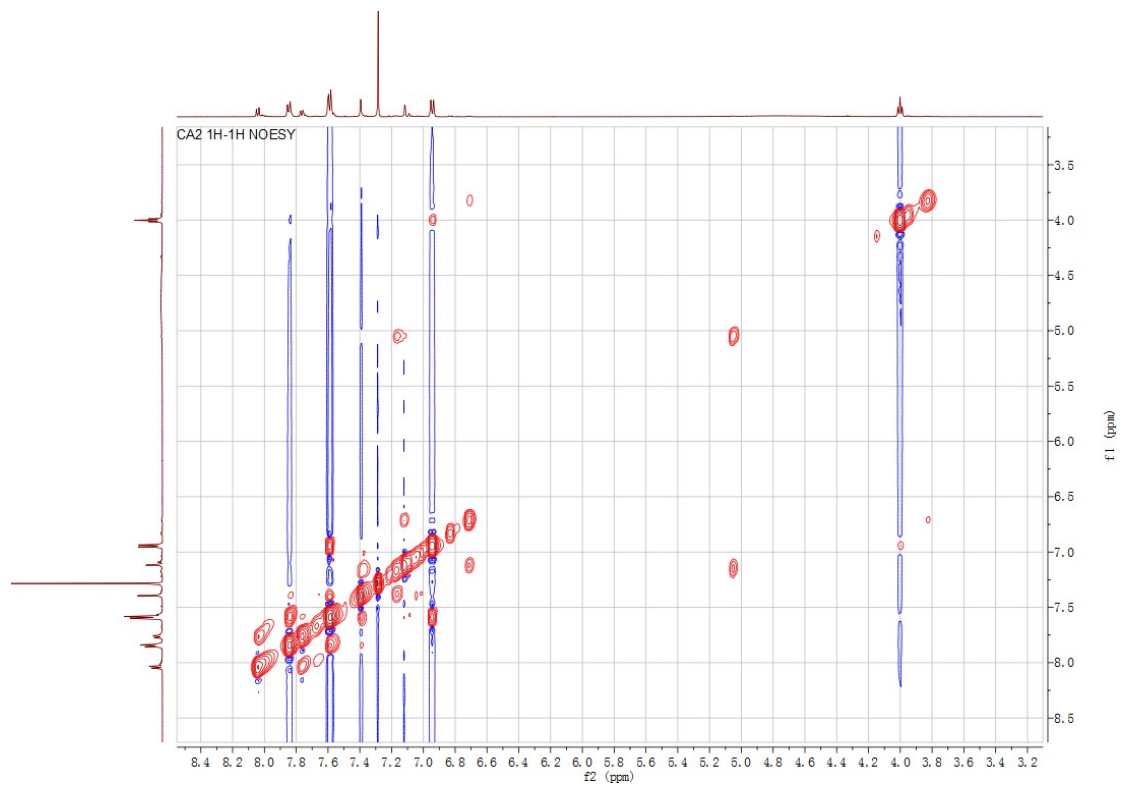

**Figure S4.** Partial 2D  $^1\text{H}$ - $^1\text{H}$  NOESY NMR spectrum of CA2 in  $\text{CDCl}_3$ .

### 3. Figures and charts

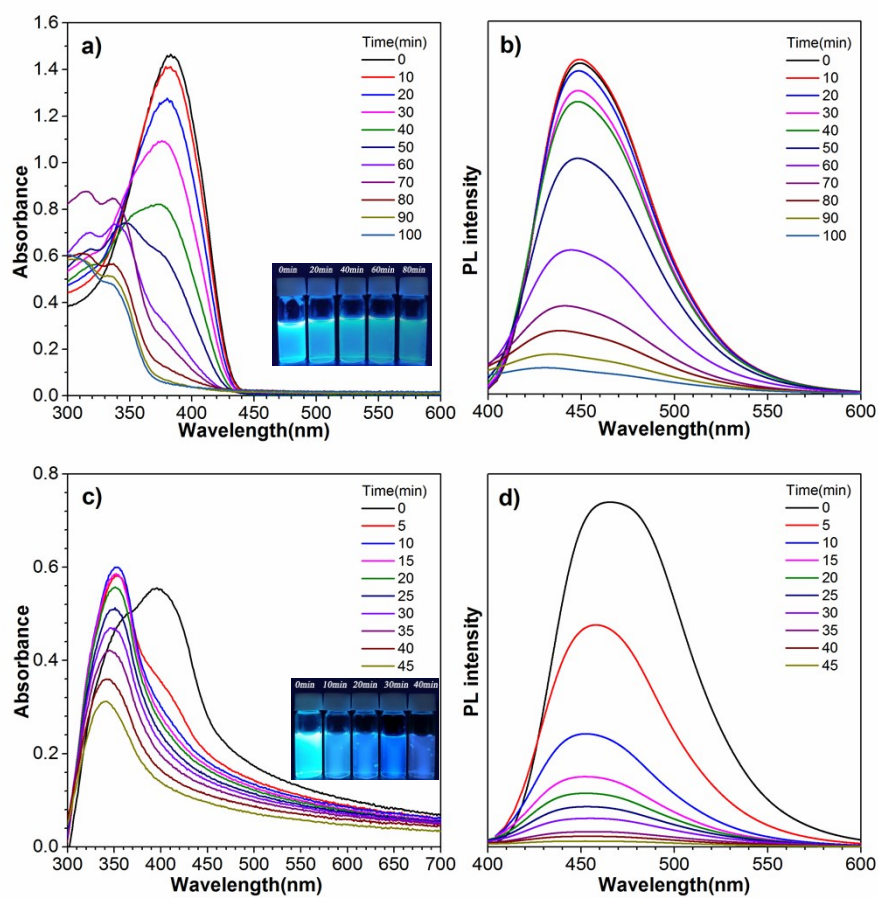

**Figure S5.** UV-Vis absorption and PL spectra of cruciform AIEgens CA2 in THF solution (a, b), and in THF/H<sub>2</sub>O mixture with  $f_W = 90\%$  (c, d) after irradiation with 365 nm UV light from a hand-held UV lamp for different time. Concentration = 10  $\mu\text{M}$ . Inset: photos of the sample in THF solution or nano-aggregates (at  $f_W = 90\%$ ) after UV irradiation.

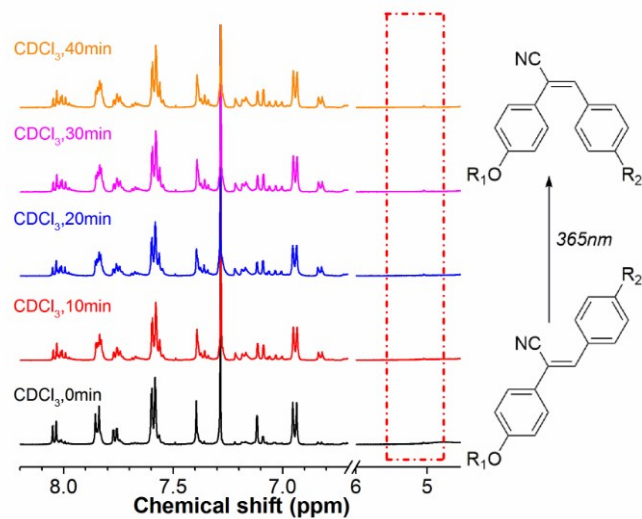

**Figure S6.** <sup>1</sup>H NMR spectrum of CA2 in CDCl<sub>3</sub> irradiated with 365 nm UV light from a hand-held UV lamp for different time. The photo-irradiation experiment was performed using 365 nm ultraviolet light from a flashlight (3W). Solution of sample CA2 in a NMR tube was placed at the distance of 1 cm from the light source.



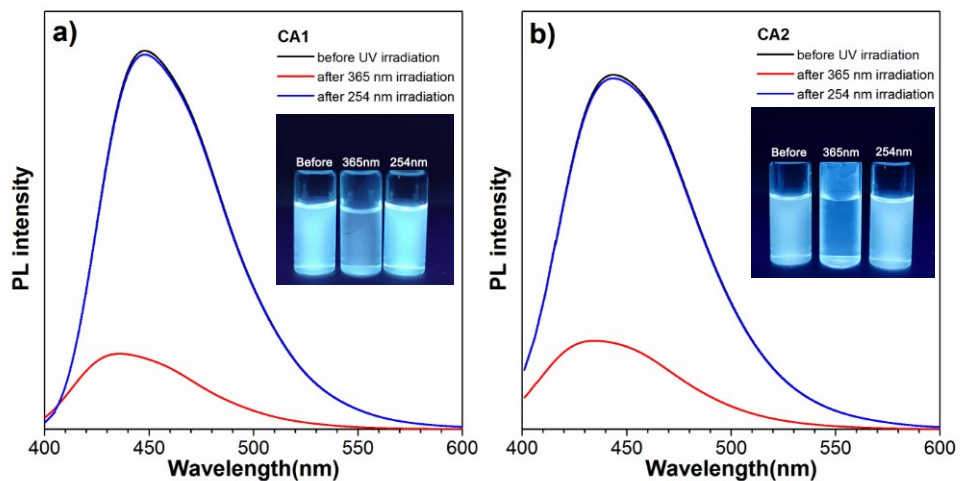

**Figure S7.** PL spectra of CA1 (a) and CA2 (b) in THF solution after 365 nm UV irradiation for 70 min and subsequent 254 nm UV irradiation for 5 hours. Concentration = 10  $\mu$ M. Inset: photos of the sample in THF solution after UV irradiation.

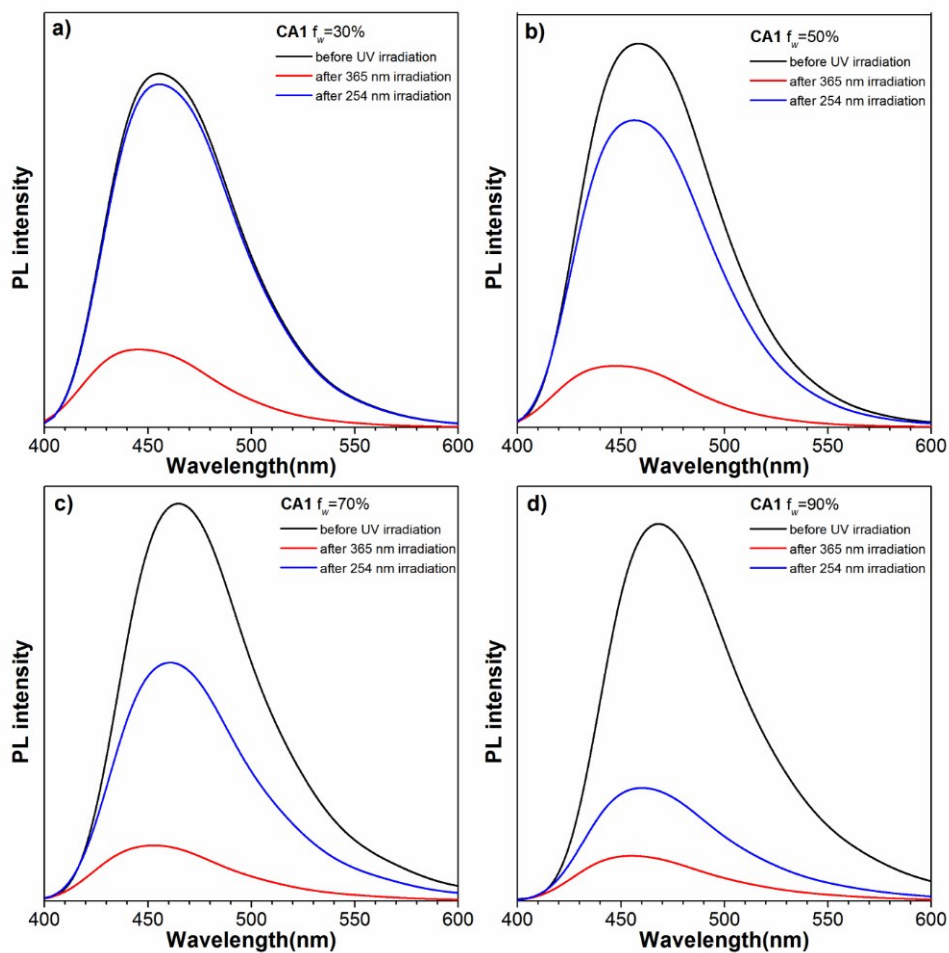

**Figure S8.** Changes of photoluminescence spectra of CA1 in THF/H<sub>2</sub>O mixtures with  $f_w$  of (a) 30%, (b) 50%, (c) 70%, and (d) 90% upon 365 nm UV light irradiation for 60, 50, 40, 30 minutes respectively, and subsequent 254 nm UV light irradiation for 5 hours from a hand-held lamp.

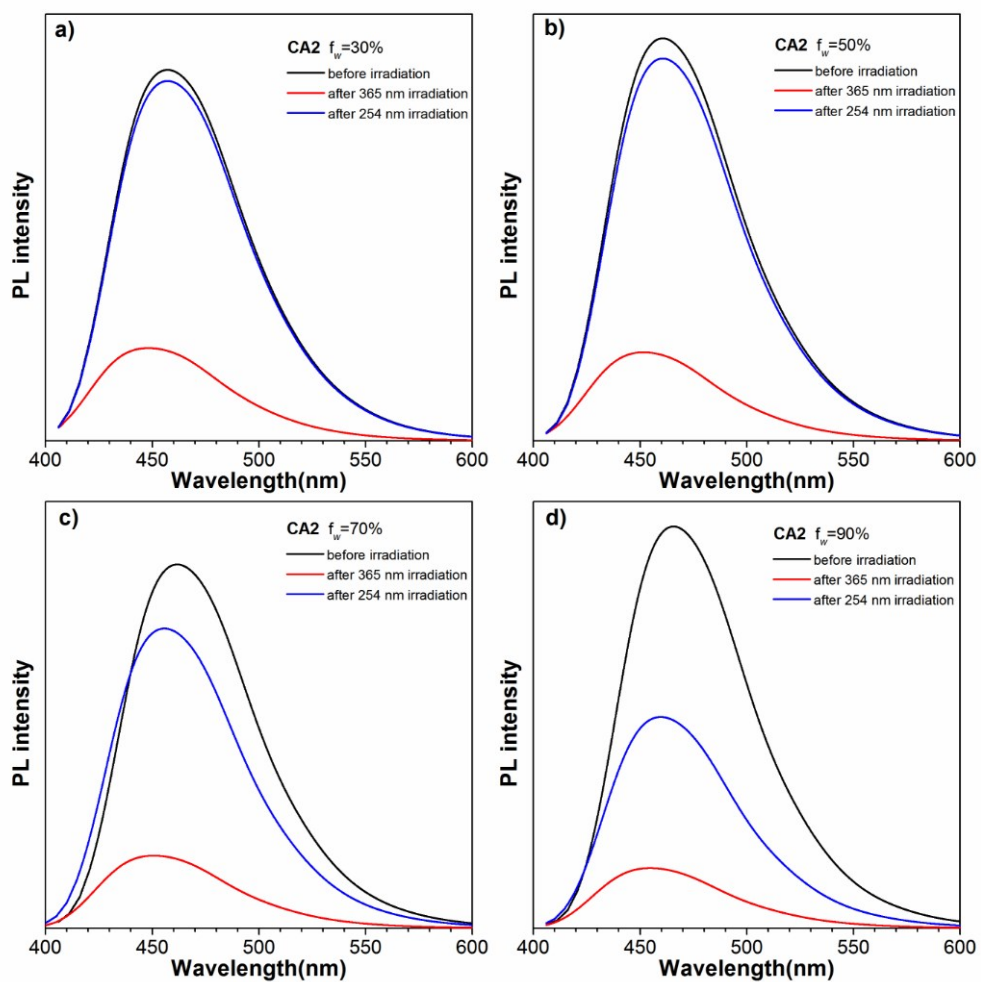

**Figure S9.** Changes of photoluminescence spectra of **CA2** in THF/H<sub>2</sub>O mixtures with  $f_w$  of (a) 30%, (b) 50%, (c) 70%, and (d) 90% upon 365 nm UV light irradiation for 60, 50, 40, 30 minutes respectively, and subsequent 254 nm UV light irradiation for 5 hours from a hand-held lamp.

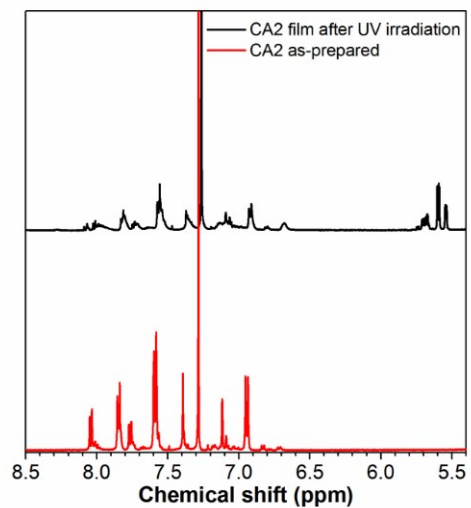

**Figure S10.** <sup>1</sup>H NMR spectrum of CA2 sample in CDCl<sub>3</sub>, which was previously irradiated in the neat film. Film of sample CA2 on a glass sheet was placed at the distance of 5 cm from the light source, which could emit 365 nm UV light (3W).

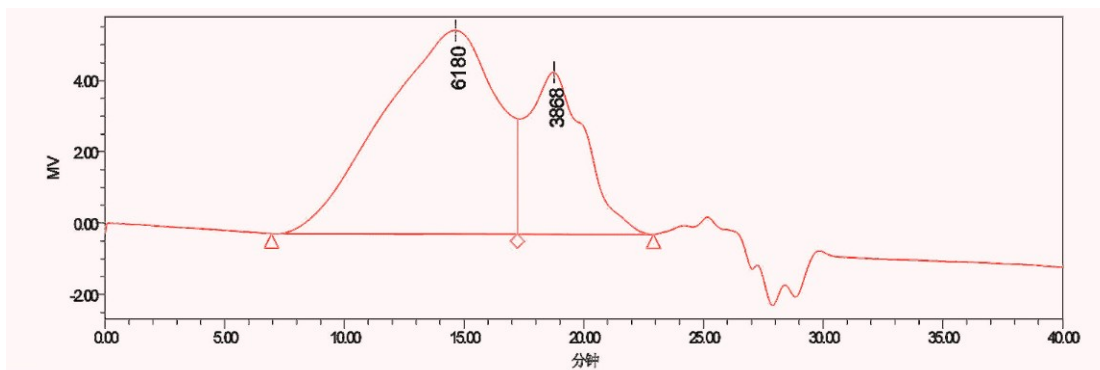

**Figure S11.** GPC curve of CA1 sample, which was previously irradiated with 365 nm UV light (3W) in the neat film.

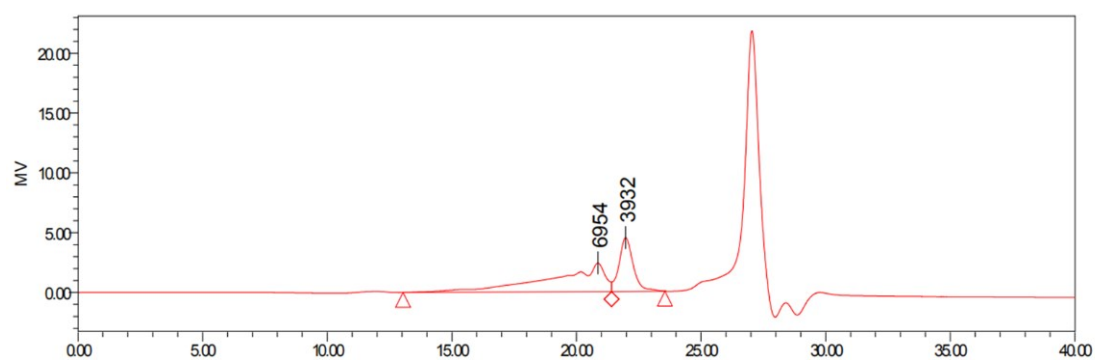

**Figure S12.** GPC curve of CA2 sample, which was previously irradiated with 365 nm UV light (3W) in the neat film.

**Table S1.** GPC data of CA1 sample, which was previously irradiated with 365 nm UV light (3W) in the neat film.

| Distribution Name | Mn (Daltons) | Mw (Daltons) | MP (Daltons) | Mz (Daltons) | Mz+1 (Daltons) | Polydispersity | Mz/Mw    | Mz+1/Mw  |
|-------------------|--------------|--------------|--------------|--------------|----------------|----------------|----------|----------|
| 1                 | 10160        | 20090        | 6180         | 35434        | 47852          | 1.977334       | 1.763763 | 2.38188  |
| 2                 | 3752         | 4667         | 3868         | 4519         | 5988           | 1,243854       | 0.968288 | 1.283051 |

**Table S2.** GPC data of CA2 sample, which was previously irradiated with 365 nm UV light (3W) in the neat film.

| Distribution Name | Mn (Daltons) | Mw (Daltons) | MP (Daltons) | Mz (Daltons) | Mz+1 (Daltons) | Polydispersity | Mz/Mw    | Mz+1/Mw  |
|-------------------|--------------|--------------|--------------|--------------|----------------|----------------|----------|----------|
| 1                 | 11899        | 22714        | 6954         | 72732        | 89580          | 1.908913       | 3.202078 | 3.943823 |
| 2                 | 3841         | 3919         | 3932         | 3996         | 4073           | 1.020296       | 1.019648 | 1.039296 |

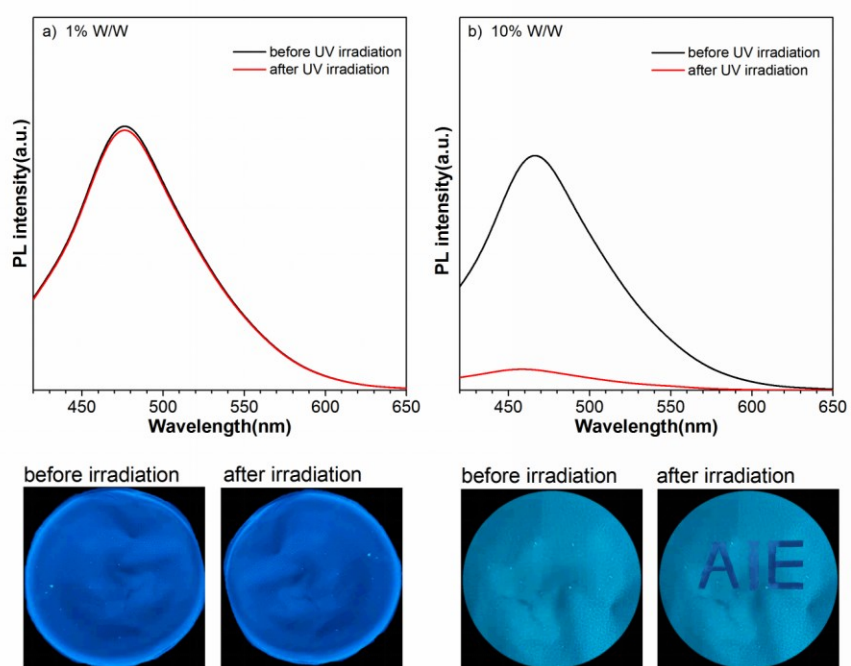

**Figure S13.** PL spectra of cruciform AIEgens CA2 dispersed in PMMA matrix (1% or 10% w/w of CA2 relative to PMMA) without and with 365 nm UV irradiation.

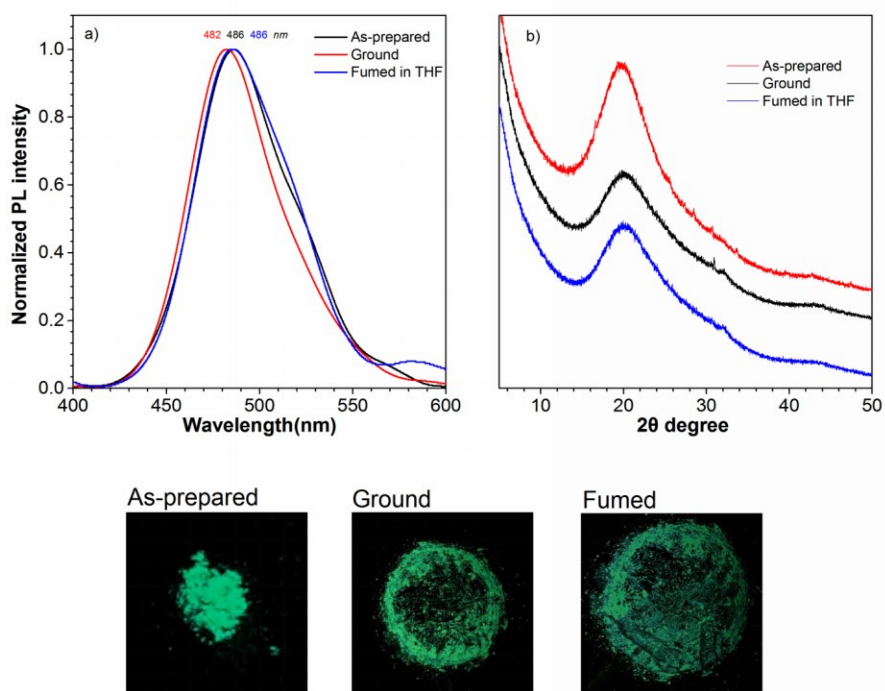

**Figure S14.** PL spectra (a), powder XRD results (b), and fluorescence images (c) of the as-prepared cruciform AIEgen CA2 samples after grinding and subsequent solvent fuming with THF for 30 min.

#### 4. NMR spectra

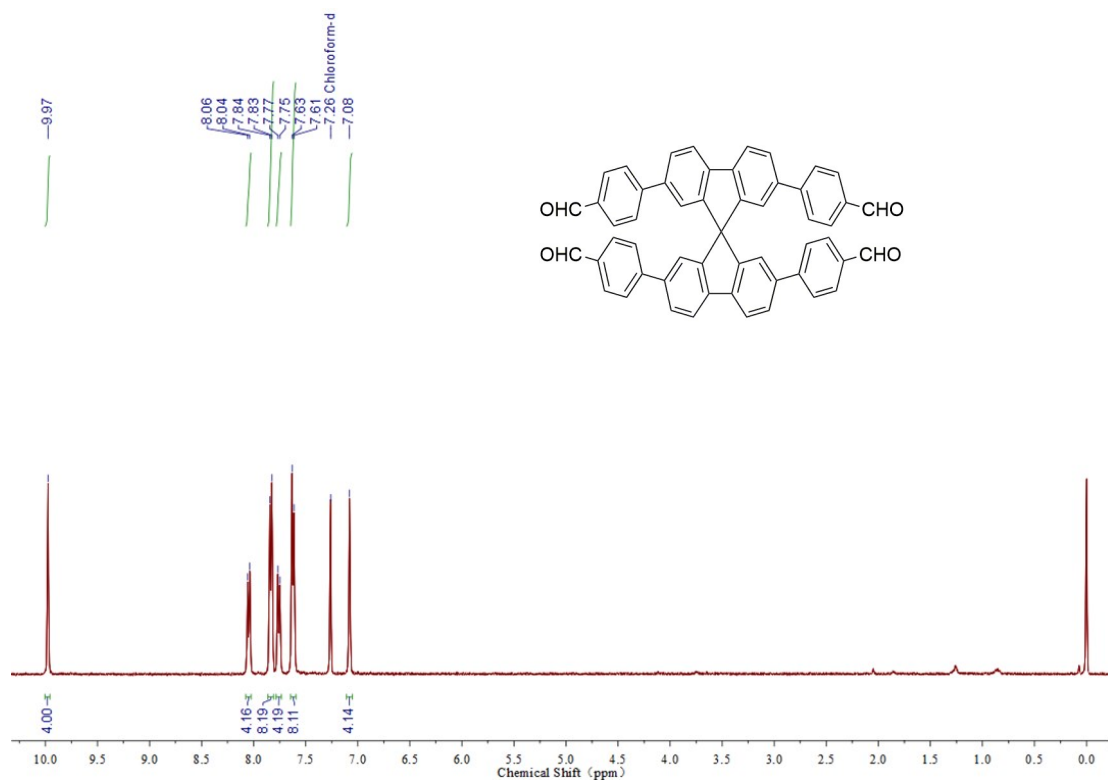

**Figure S16.** <sup>1</sup>H NMR spectrum of compound **2** in CDCl<sub>3</sub> at 298K.

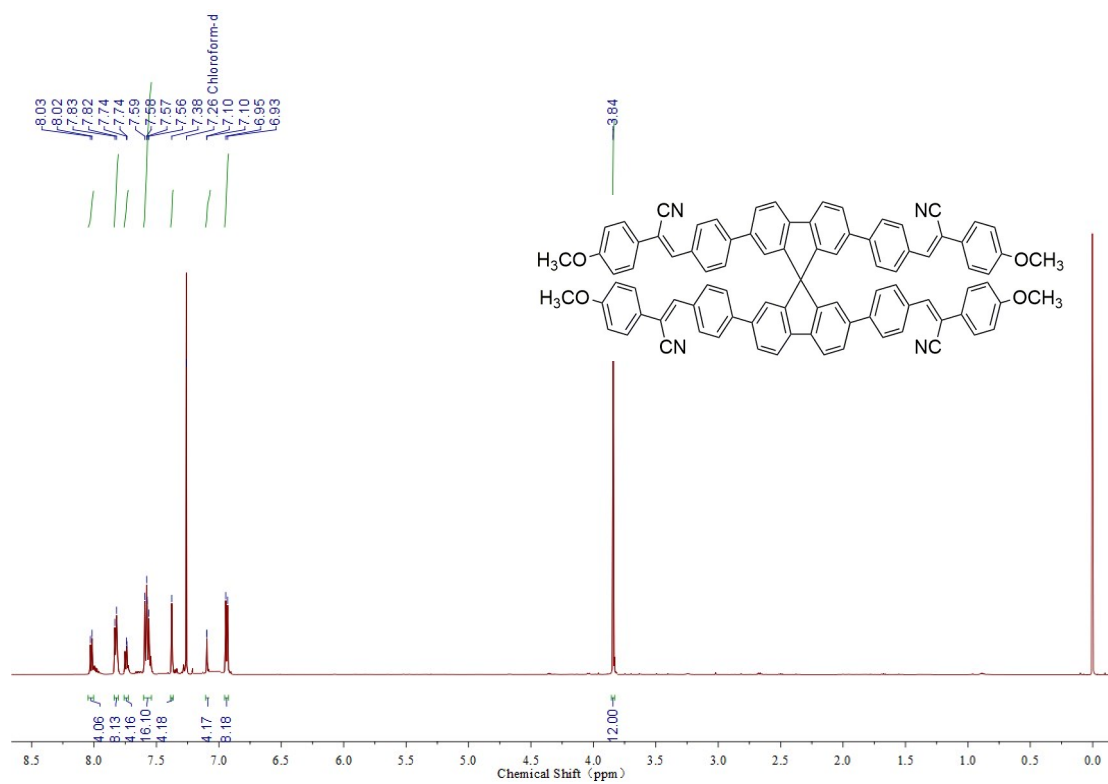

**Figure S17.** <sup>1</sup>H NMR spectrum of compound **CA1** in CDCl<sub>3</sub> at 298K.





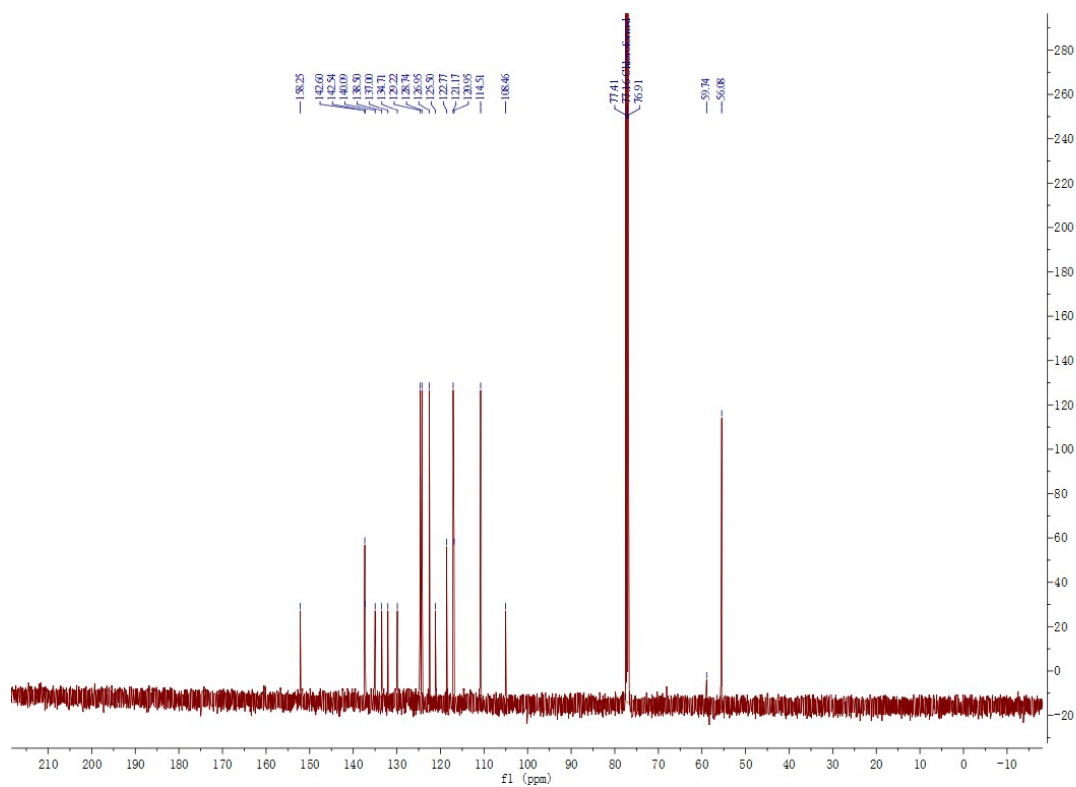

**Figure S20.** <sup>13</sup>C NMR spectrum of compound CA1 in CDCl<sub>3</sub> at 298K.

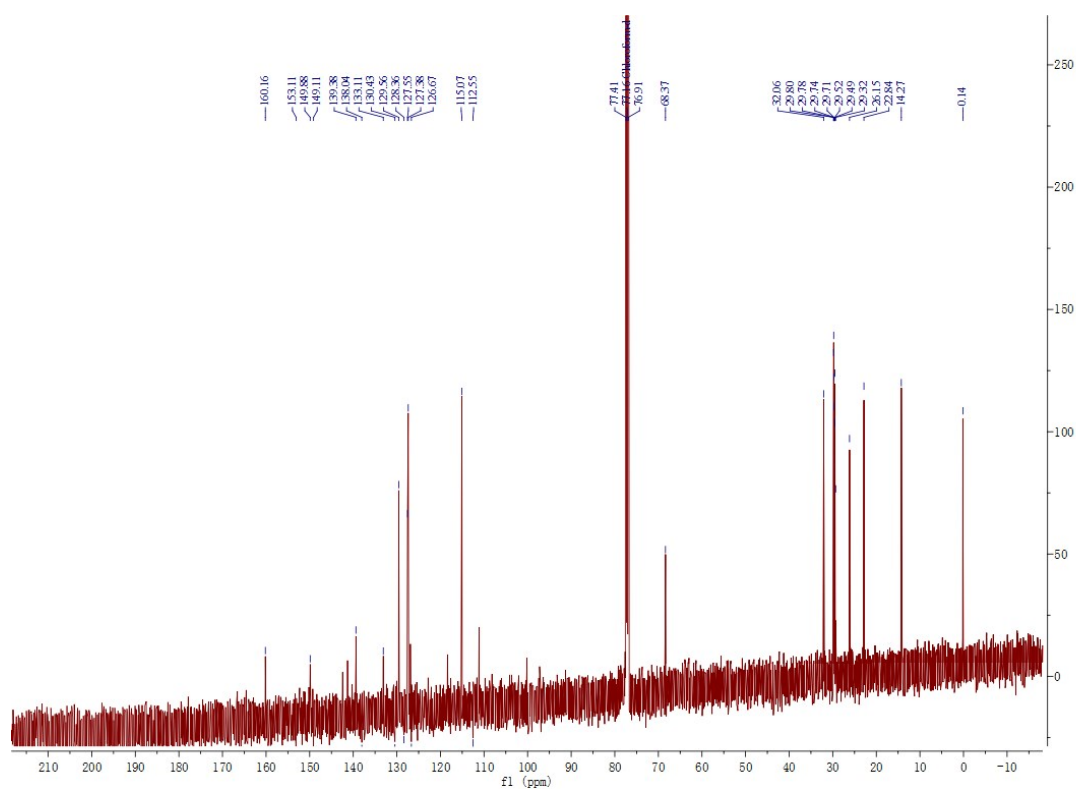

**Figure S21.** <sup>13</sup>C NMR spectrum of compound CA2 in CDCl<sub>3</sub> at 298K.
